# Supplementary material for: Integrated Computational Analysis Highlights unique miRNA Signatures in the Subventricular Zone and Striatum of GM2 Gangliosidosis Animal Models
Source: MDPI journal article supplement (doi:10.3390/ijms20133179), 2019-06-28
Supplement: s1 [file s1]

## Figure S1

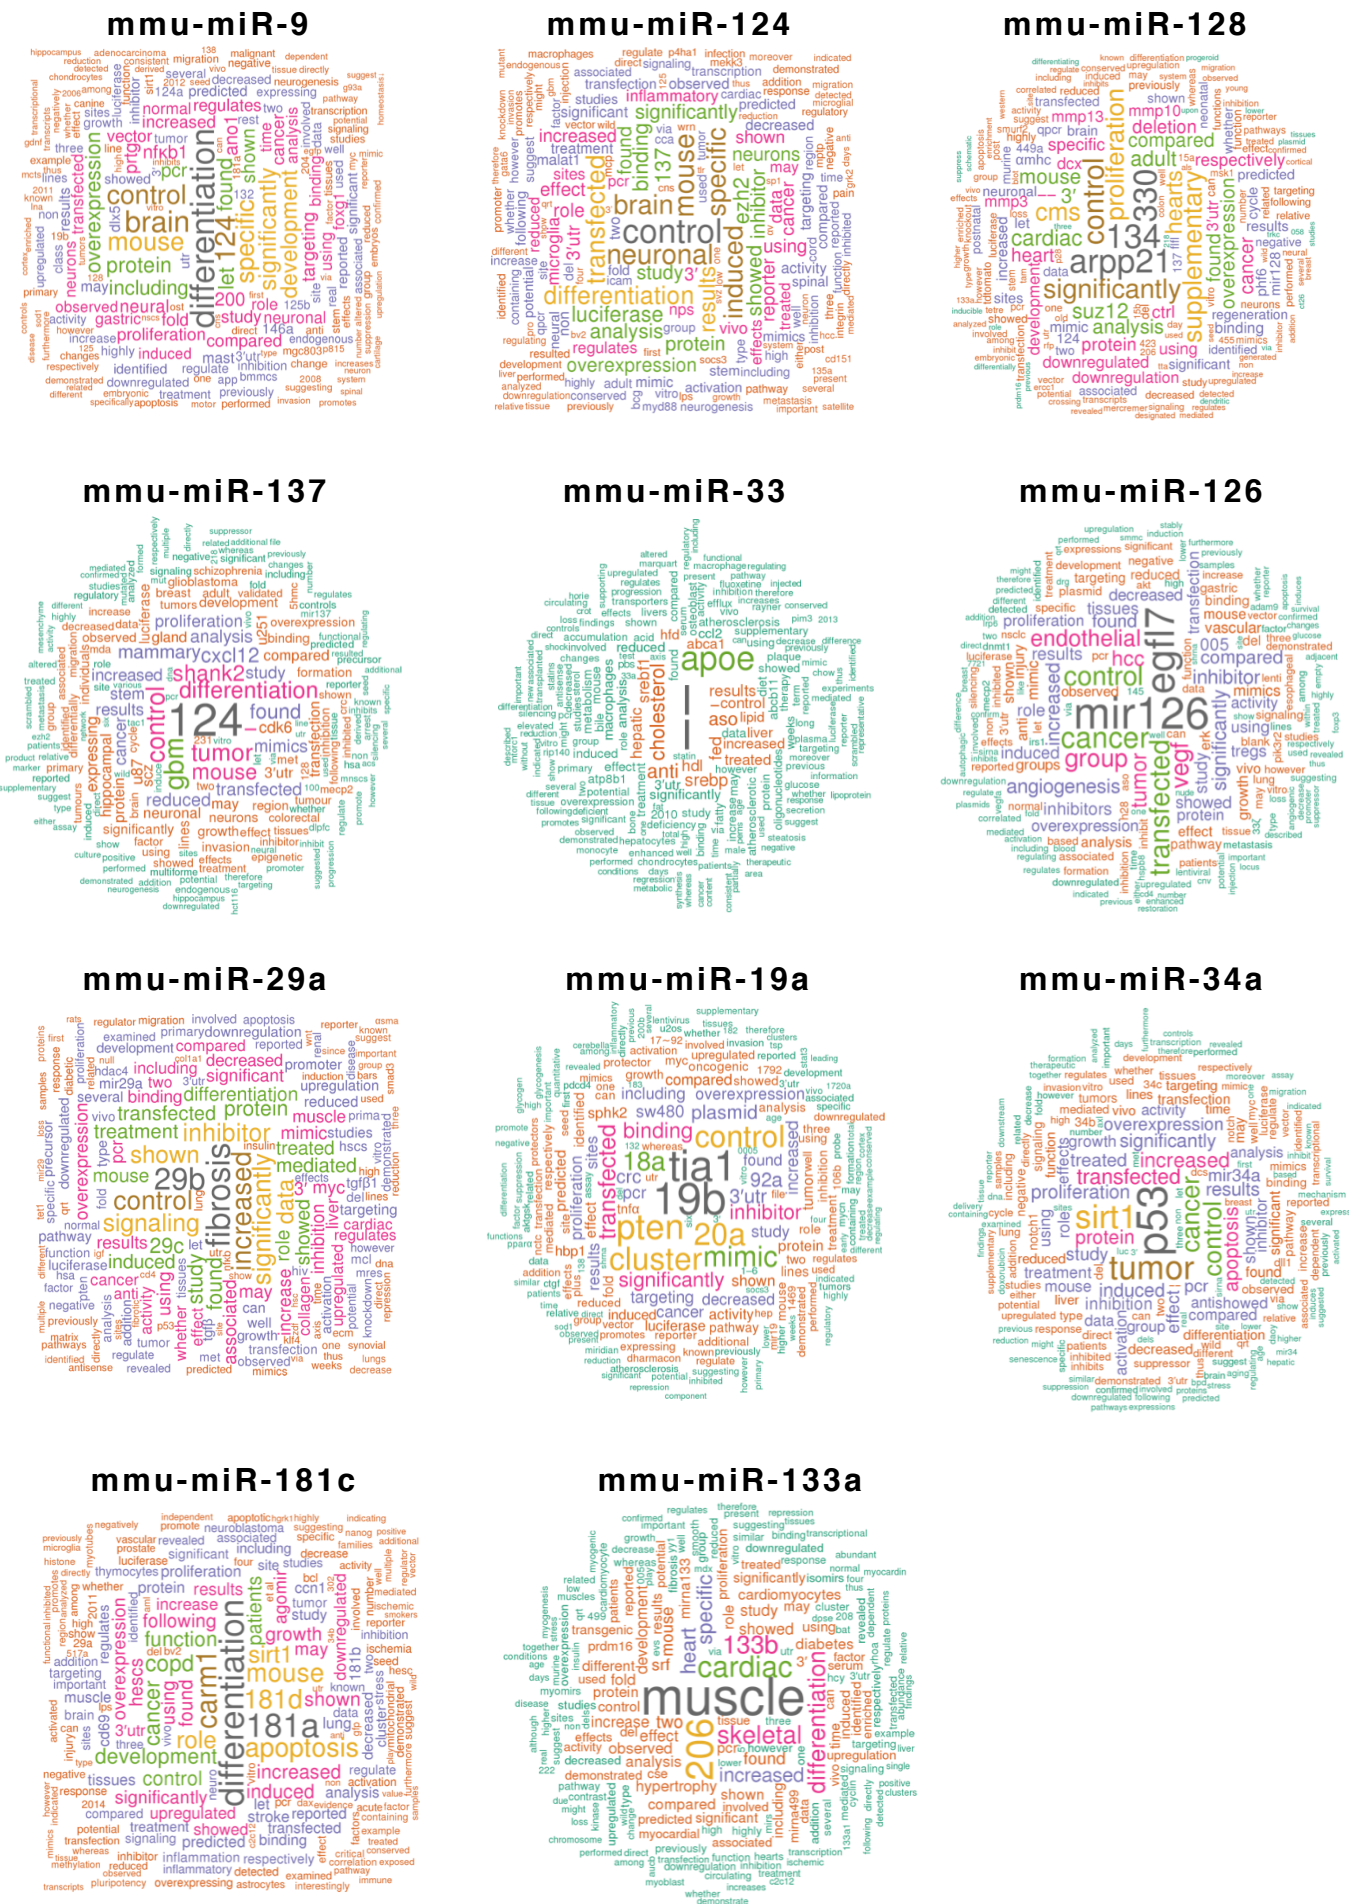

**Figure S1.** Word cloud based on literature (open access papers) for each miRNA, and from searchable database miRBASE ([www.mirbase.org](http://www.mirbase.org)).

Figure S2

a

Pathways

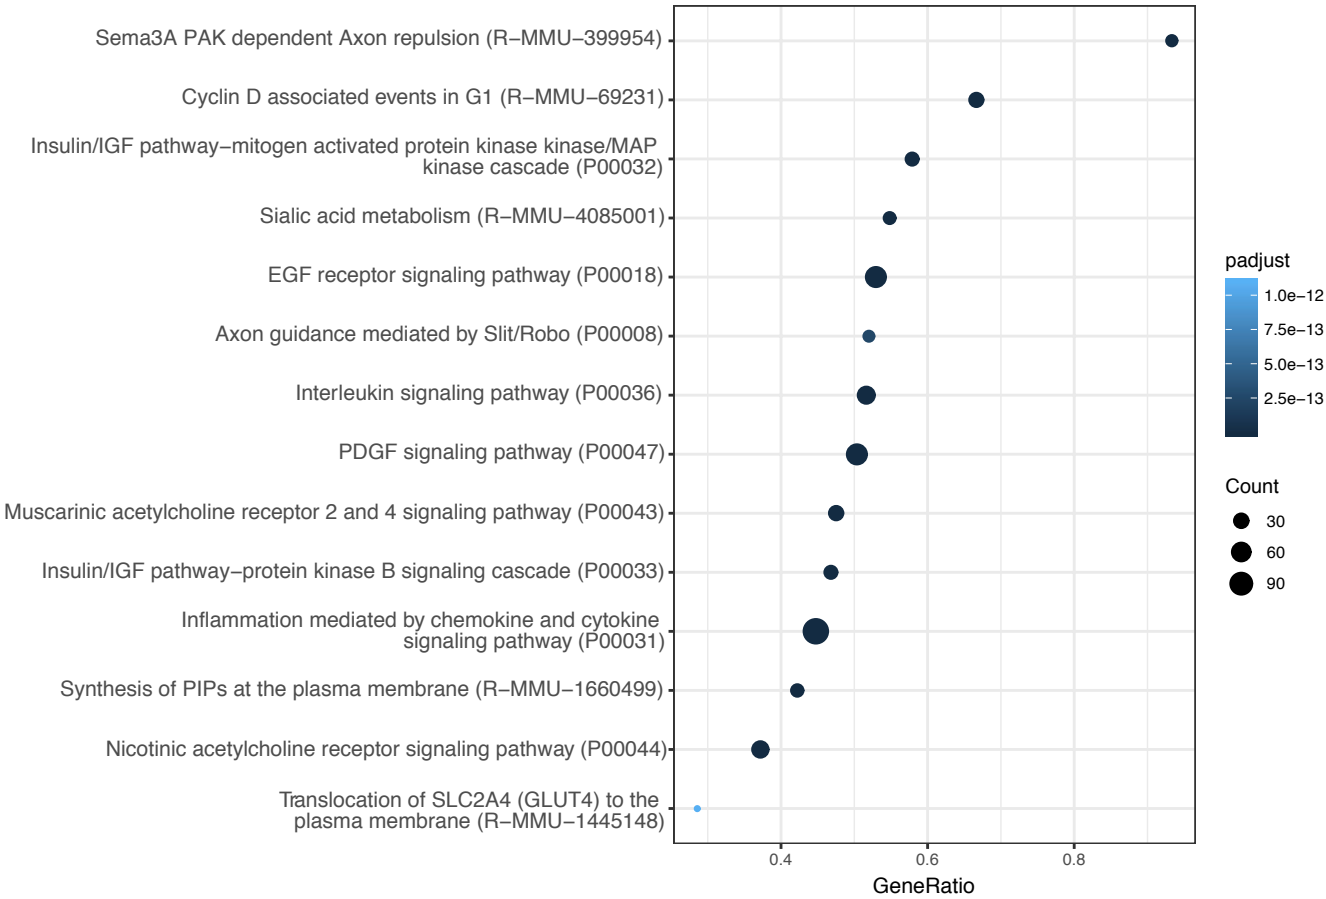

b

Pathways

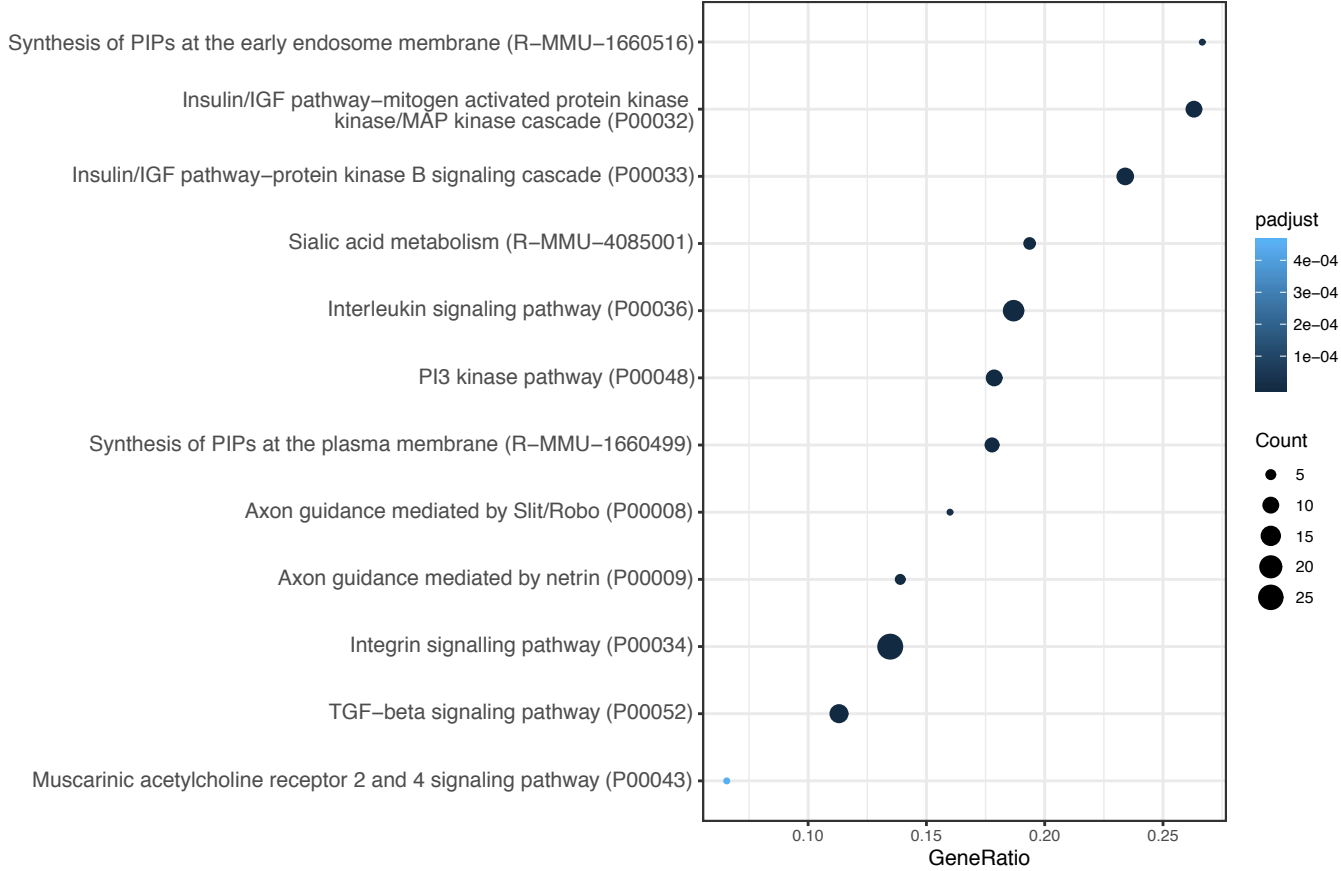

**Figure S2.** Dotplot of enrichment analysis in: (a) SD-SVZ compared to SD-STR.; Panther (P) and Reactome (R-MMU) pathways; (b) and in TSD-SVZ compared to TSD-STR.; Panther (P) and Reactome (R-MMU) pathways. Padjusted < 0.05 was considered statistically significant.
